# Supplementary material for: Akzeptanz digitaler Apps in der Nachsorge von Patient*innen mit Kopf-Hals-Tumoren
Source: Springer Nature journal article supplement (doi:10.1007/s00106-024-01463-6), 2024-05-03
Supplement: MOESM1 [file 27048142]

# Patient:innen - Fragebogen

Sehr geehrte Patientin, sehr geehrter Patient,

um unsere Behandlung weiter zu verbessern, benötigen wir Ihre Hilfe. Wir möchten gerne einschätzen, ob wir die Tumornachsorge und -therapie durch ein elektronisches Informationsangebot via einer Smartphone-Applikation (App) optimieren können. Mit Hilfe einer App könnten wir auch Ihre Beschwerden zu Hause erfassen und Sie möglicherweise frühzeitiger unterstützen.

Wir würden Sie daher bitten, uns folgende Fragen zu beantworten. Die Teilnahme ist anonym und dauert nur wenige Minuten.

Falls eine Frage für Sie aktuell nicht zutrifft, lassen Sie die entsprechenden Kästchen bitte frei.

Wir danken Ihnen sehr für Ihre Mithilfe!

---

**Bitte kreuzen Sie unter/neben jeder Frage das Kästchen an, welches die Frage am besten beantwortet.**

1. Geschlecht:  weiblich  männlich      Alter: \_\_\_\_\_
  
2. Tumorursprung:  Mundhöhle  Oropharynx (u. a. Mandel, Zungengrund)  
 Hypopharynx (tiefer Rachen)  Kehlkopf  
 Anderes
  
3. **Ist Ihr Tumor mit dem humanen Papilloma Virus (HPV) verbunden?**  
 Ja  nein  nicht bekannt
  
4. **Was ist ihr höchster Bildungsabschluss**  
 (noch) kein Schulabschluss  Hauptschulabschluss  Realschulabschluss  
 Abitur  Hochschulabschluss  Promotion  Anderer
  
5. **Welche Behandlung erhalten Sie aktuell bzw. ist geplant (Mehrfachauswahl möglich)**  
 Operation  Bestrahlung/Strahlenchemotherapie  
 Systemtherapie (Chemotherapie, Immuntherapie)  Keine Therapie/Nachsorge
  
6. **Fühlen Sie sich über Ihre Erkrankung ausreichend informiert?**  
(1 trifft voll und ganz zu – 5 trifft nicht zu)  
      
1      2      3      4      5
  
7. **Wünschen Sie sich mehr Informationen zu Ihrer Erkrankung?**  
(1 Trifft voll und ganz zu – 5 trifft nicht zu)  
      
1      2      3      4      5
  
8. **Wie würden Sie sich weitere Informationen über Ihre Erkrankung wünschen?**  
 Informations-Broschüren  Web-basiertes Patient:innenportal  Smartphone-basiert  
 Sprechstunde  Selbsthilfegruppe  Hotline für Tumorpatient:innen

**9. Haben Sie ein Smartphone?** Ja  nein**10. Welches Betriebssystem nutzen Sie auf Ihrem Smartphone?** iPhone OS (iOS)  Android-basiert**11. Nutzen Sie Smartphone Applikationen (Apps)?** Ja  nein**12. Nutzen Sie das Internet, um Informationen über Ihre Erkrankung zu gewinnen?** Ja  nein**13. Würden Sie eine Smartphone App mit Informationen zu Ihrer Tumorerkrankung nutzen?**

(1 trifft voll und ganz zu – 5 trifft nicht zu)

      
1 2 3 4 5**14. Würden Sie Ihre Beschwerden bzw. Gesundheitsdaten in einer Smartphone App angeben?**

(1 trifft voll und ganz zu – 5 trifft nicht zu)

      
1 2 3 4 5**Wenn nein, warum nicht?**

---

**15. Würden Sie Papier-basierte Fragebögen zur Einschätzung Ihrer Beschwerden bevorzugen?**

(1 Trifft voll und ganz zu - 5 trifft nicht zu)

      
1 2 3 4 5**16. Würden Sie Computer-basierte Fragebögen (digitales Portal auf einer Homepage) zur Einschätzung Ihrer Beschwerden bevorzugen?**

(1 Trifft voll und ganz zu - 5 trifft nicht zu)

      
1 2 3 4 5**17. Könnte ihrer Meinung nach eine Smartphone App die Behandlung unterstützen?**

(1 trifft voll und ganz zu – 5 trifft nicht zu)

      
1 2 3 4 5**18. Würden Sie mit einer Smartphone App mit ihren Behandlern in Kontakt treten?**

(1 trifft voll und ganz zu – 5 trifft nicht zu)

      
1 2 3 4 5

**19. Wären Sie einverstanden, wenn ihre Gesundheitsdaten durch eine Smartphone App an Ihre behandelten Ärzt:innen gesendet werden?**

(1 trifft voll und ganz zu – 5 trifft nicht zu)

- 1      2      3      4      5

**20. Wäre eine Erinnerung an Nachsorge-Termine durch eine Smartphone App hilfreich?**

(1 trifft voll und ganz zu – 5 trifft nicht zu)

- 1      2      3      4      5

**21. Könnten Sie sich vorstellen an einer Studie teilzunehmen bei der Ihre Tumornachsorge basierend auf Ihren Beschwerdeangaben in einer Smartphone App angepasst wird?**

(1 trifft voll und ganz zu – 5 trifft nicht zu)

- 1      2      3      4      5

**22. In welchen Bereichen der Behandlung und Nachsorge wäre eine Smartphone App für Sie am hilfreichsten (Mehrfachauswahl möglich)?**

- Kontrolle der Beschwerden     Informationsvermittlung     Terminerinnerung
- Anleitung zu Therapien (Verhaltenstherapie, Entspannungstechniken, Bewegungstherapie)
- Kommunikation mit der Ärztin/Arzt

**Welche Anregungen zur Verbesserung der Tumornachsorge und -behandlung haben Sie an uns?**

---

---
